# Supplementary material for: Single-color, ratiometric biosensors for detecting signaling activities in live cells
Source: eLife. 2018 Jul 3;7:e35458. doi: 10.7554/eLife.35458 (PMC6037473; doi:10.7554/eLife.35458)
Supplement: Figure 1—source data 1. — (a) Sheet 1, Figure 1b Time Course. Time course for mVenus-cp17Venus FLARE AKAR, wild type and kinase-inactive threonine-alanine (TA) mutant. (b) Sheet 2, Figure 1b Summary: Comparison of magnitude of responses for individual cells for Venus-cp172Venus FLARE AKAR, wild type and kinase-inactive threonine-alanine (TA) mutant, as well as statistics comparing the two groups. (c) Sheet 3, Figure 1c. Summary of magnitude of responses for various color variants of FLARE AKAR after stimulation with forskolin and IBMX. [file elife-35458-fig1-data1.xlsx]

## Sheet: Figure 1b Time Course
Venus-cpVenus FLARE AKAR
Wild Type					TA Mutant
Time	Mean	SEM	N		Time	Mean	SEM	N
-4	-0.00138097	0.000479667	44		-4	-0.00168871	0.000290944	38
-3.5	-0.000706837	0.000425543	44		-3.5	-0.00128733	0.000245821	38
-3	-0.000963022	0.000385508	44		-3	-0.00109827	0.000229392	38
-2.5	-0.000993091	0.000307701	44		-2.5	-0.000724039	0.000248056	38
-2	-0.000482333	0.00030548	44		-2	-0.000651056	0.000254916	38
-1.5	-0.000528128	0.000245164	44		-1.5	-0.000431654	0.00020982	38
-1	0.000173941	0.000374644	44		-1	-0.000268209	0.000179787	38
-0.5	-6.42817e-05	0.000239517	44		-0.5	-0.000125146	0.000253111	38
0	0	0	44		0	0	0	38
0.5	0.00115435	0.00029673	44		0.5	-0.0002547	0.000403288	38
1	0.00263457	0.000436041	44		1	0.000286277	0.000200705	38
1.5	0.0126161	0.000872611	44		1.5	0.000349981	0.000245572	38
2	0.0180194	0.00108918	44		2	0.000794793	0.000334478	38
2.5	0.0213738	0.000970208	44		2.5	0.000339198	0.00043378	38
3	0.0229014	0.000714593	44		3	0.00171647	0.000262406	38
3.5	0.0243431	0.000779742	44		3.5	0.00160669	0.000288811	38
4	0.0260068	0.000729346	44		4	0.0022199	0.000309925	38
4.5	0.0259816	0.000731224	44		4.5	0.00199903	0.000343034	38
5	0.0266062	0.000783102	44		5	0.00266821	0.000424787	38
5.5	0.0271606	0.000751904	44		5.5	0.00257987	0.00038507	38
6	0.0273037	0.000832135	44		6	0.00267883	0.000417028	38
6.5	0.0275122	0.000810059	44		6.5	0.00289443	0.000391841	38
7	0.0278124	0.000821951	44		7	0.0032451	0.000440093	38
7.5	0.0285068	0.000874281	44		7.5	0.0031988	0.000433066	38
8	0.0279011	0.000874087	44		8	0.00347609	0.00041444	38
8.5					8.5	0.00371698	0.000485504	38
9	0.0241118	0.00103747	44		9	0.00364975	0.000421569	38
9.5	0.0230253	0.00103944	44		9.5	0.00373144	0.000507177	38
10	0.0213817	0.00110683	44		10	0.00359521	0.000446157	38
10.5	0.0204402	0.001027	44		10.5	0.00330987	0.000385909	38
11	0.0196167	0.00109089	44		11	0.00343418	0.000396038	38
11.5	0.0184126	0.00116425	44		11.5	0.00358061	0.000398341	38
12	0.0183959	0.00109689	44		12	0.00352339	0.000369242	38
12.5	0.0176804	0.00107147	44		12.5	0.00367094	0.000394248	38
13	0.0165661	0.00124214	44		13	0.00373876	0.000363794	38
13.5	0.0168557	0.00108906	44		13.5	0.00337406	0.00038831	38
14	0.0167024	0.00112792	44		14	0.00371781	0.000408311	38
14.5	0.0164133	0.00114183	44		14.5	0.00396943	0.000374348	38
15	0.0162295	0.00118957	44

## Sheet: Figure 1b Summary
Venus-cpVenus FLARE AKAR
Magnitude of Responses
WT	TA mutant		Table Analyzed	Venus-cpVenus AKAR summary
0.0218031	0.00192884
0.0281994	0.00411467		Column B	TA
0.0267046	0.00330774		vs.	vs.
0.0256515	0.00248684		Column A	WT
0.0271141	0.00510938
0.0242055	0.00553646		Unpaired t test
0.0315785	0.00615531		P value	<0.0001
0.0307215	0.00289819		P value summary	****
0.0360559	0.0024318		Significantly different (P < 0.05)?	Yes
0.0349089	0.00156222		One- or two-tailed P value?	Two-tailed
0.0325348	0.00540175		t, df	t=23.42 df=75
0.033706	0.00348297
0.0205918	0.00640761		How big is the difference?
0.0333916	0.00895399		Mean ± SEM of column A	0.02803 ± 0.0008233, n=44
0.0264884	0.00479173		Mean ± SEM of column B	0.004029 ± 0.000439, n=33
0.0344307	0.0026867		Difference between means	-0.024 ± 0.001025
0.0342244	0.00456555		95% confidence interval	-0.02605 to -0.02196
0.0262598	0.00143161		R squared (eta squared)	0.8797
0.0299951	0.00170797
0.0257816	0.00964535		F test to compare variances
0.0263442	0.00343625		F, DFn, Dfd	4.691, 43, 32
0.0257631	0.00420147		P value	<0.0001
0.0345319	0.00271275		P value summary	****
0.0306222	0.00368705		Significantly different (P < 0.05)?	Yes
0.0167636	0.00585781
0.0204665	0.00764271
0.0196616	0.00418483
0.0277805	0.00481276
0.023047	0.00572892
0.031933	0.00166929
0.0337034	0.00724987
0.0197623	-0.00250787
0.0219401	-0.000330264
0.0188478
0.0290541
0.0243164
0.0182709
0.0323329
0.0329139
0.03489
0.0286228
0.0284896
0.0353195
0.0337304

## Sheet: Figure 1c
FLARE AKAR Color Variants
mVen-cpVen	mVen-mVen	EGFP-EGFP	mCh-mCh	mCer3-mCer3	mCer3-cpCer3
0.0218031	0.0198245	0.0123425	0.00859419	0.00270435	0.0103646
0.0281994	0.0135441	0.0131976	0.012477	0.00686484	0.00606662
0.0267046	0.017884	0.0266235	0.010447	0.00216935	0.0107006
0.0256515	0.0219503	0.014375	0.00859419	0.00348552	0.00799472
0.0271141	0.0258133	0.0199055	0.012477	0.00574618	0.0057406
0.0242055	0.0217051	0.0234558	0.010447	0.00861307	0.00684589
0.0315785	0.0250191	0.0173257	0.0119575	0.00190413	0.00417226
0.0307215	0.0191791	0.0144127	0.0103822	0.00170166	0.011449
0.0360559	0.0182816	0.0203356	0.00888115	0.00329289	0.0111991
0.0349089	0.0170136	0.0179613	0.00922207	0.00126766	0.00712403
0.0325348	0.0242748	0.0243836	0.00608178		0.00924445
0.033706	0.0433344	0.0161669	0.0097465		0.00870515
0.0205918	0.0332747	0.0201079	0.00896033		0.00508215
0.0333916	0.0136692		0.00853144		0.00667416
0.0264884	0.0157477		0.0101512		0.00272673
0.0344307	0.00550892		0.00919725		0.00544301
0.0342244	0.0134059		0.00864637		0.00619253
0.0262598	0.0160766		0.00757027		0.00364343
0.0299951	0.0169364		0.0105348		0.00667833
0.0257816	0.0156785		0.00863618		0.00626342
0.0263442	0.0154649		0.0117602		0.00883001
0.0257631	0.0140105		0.0088765		0.00744393
0.0345319	0.0172436		0.00918117		0.00734884
0.0306222	0.0159394		0.0106195		0.0107569
0.0167636	-0.000757679		0.00955911		0.00688051
0.0204665	0.0249773				0.00392912
0.0196616	0.0192895
0.0277805	0.00363739
0.023047	0.0141409
0.031933	0.0113835
0.0337034	0.00610299
0.0197623	0.00637221
0.0219401
0.0188478
0.0290541
0.0243164
0.0182709
0.0323329
0.0329139
0.03489
0.0286228
0.0284896
0.0353195
0.0337304
