# Supplementary material for: Single-color, ratiometric biosensors for detecting signaling activities in live cells
Source: eLife. 2018 Jul 3;7:e35458. doi: 10.7554/eLife.35458 (PMC6037473; doi:10.7554/eLife.35458)
Supplement: Figure 2—source data 1. — (a) Sheet 1, Figure 2a. Time course for Venus-cp172Venus FLARE EKAR, both wild type and kinase-inactive (TA) mutant. (b) Sheet 2, Figure 2a. Comparison of magnitudes of anisotropy changes for Venus-cp172Venus FLARE EKAR, both wild type and kinase-inactive (TA) mutant, of upon EGF addition, and relevant statistical tests to compare the two variants. (c) Sheet 3, Figure 2—figure supplement 1c. Changes of magnitudes of anisotropy change for various FLARE EKAR variants upon EGF addition. (d) Sheet 4, Figure 2b. Time course for Venus-cp172Venus FLARE CKAR, both wild type and kinase-inactive (TA) mutant. (e) Sheet 5, Figure 2b. Comparison of magnitudes of anisotropy changes for Venus-cp172Venus FLARE EKAR, both wild type and kinase-inactive (TA) mutant, of upon EGF addition, and relevant statistical tests to compare the two variants. (f) Sheet 6, Figure 2—figure supplement 2. Time courses for CKAR1 and CKAR2. (g) Sheet 7, Figure 2—figure supplement 3c. Changes of magnitudes of anisotropy change for various FLARE CKAR variants upon PMA addition. (h) Sheet 8, Figure 2c. Time course for FLARE MLCK, with either addition of KCl and vehicle only control. (i) Sheet 9, Figure 2c. Summary for magnitude of responses for FLARE MLCK. [file elife-35458-fig2-data1.xlsx]

## Sheet: Figure 2a EKAR time course
VcpV FLARE EKAR	HEK cells
	Wild Type				TA Mutant
Time	Mean	SEM	N		Mean	SEM	N
-4	-0.00110305	0.000933109	13		-4	-0.00166807	0.000581738	16
-3.5	-0.000787519	0.00138053	13		-3.5	-0.00122397	0.000575689	16
-3	-0.000333254	0.00113068	13		-3	-0.0013101	0.000579762	16
-2.5	-0.000495065	0.00114254	13		-2.5	-0.00105859	0.000641089	16
-2	0.000736056	0.00091504	13		-2	-0.000316153	0.000379719	16
-1.5	8.13319e-05	0.000876474	13		-1.5	-0.000115842	0.000431228	16
-1	0.000250323	0.00107134	13		-1	0.000274001	0.000275521	16
-0.5	0.000207047	0.00086467	13		-0.5	0.000643045	0.000294726	16
0	0	0	13		0	0	0	16
0.5	-0.000540743	0.000675047	13		0.5	0.000281337	0.000286425	16
1	0.000808711	0.000755805	13		1	0.000730868	0.000221298	16
1.5	0.00044807	0.000725373	13		1.5	0.000505439	0.000519096	16
2	-0.000320987	0.000956987	13		2	0.00109495	0.000456278	16
2.5	0.00145331	0.000924438	13		2.5	0.00134673	0.000596717	16
3	0.00271587	0.000989557	13		3	0.000735541	0.000785845	16
3.5	0.00518202	0.00139303	13		3.5	0.00100471	0.000678989	16
4	0.00652582	0.00161937	13		4	0.00111153	0.000508315	16
4.5	0.0101868	0.00154363	13		4.5	0.00127914	0.000617515	16
5	0.0126399	0.00142327	13		5	0.000659876	0.000750666	16
5.5	0.0148547	0.00138278	13		5.5	0.000186488	0.000759661	16
6	0.0151442	0.00157233	13		6	0.000915974	0.000778478	16
6.5	0.0164436	0.00140856	13		6.5	0.00060798	0.000769172	16
7	0.0167264	0.00150247	13		7	0.000108803	0.000920011	16
7.5	0.0165739	0.00120282	13		7.5	0.00055999	0.00110448	16
8	0.0168879	0.00135396	13		8	-5.67961e-05	0.00102435	16
8.5	0.0178317	0.00126988	13		8.5	0.000456018	0.00113623	16
9	0.0179403	0.00171674	13		9	0.000166284	0.00103129	16
9.5	0.0184624	0.00120793	13		9.5	8.87181e-05	0.00108441	16
10	0.0171626	0.00104859	13		10	-0.000145802	0.00125247	16
10.5	0.0171286	0.0013972	13		10.5	-9.78065e-05	0.00112132	16
11	0.017302	0.00119221	13		11	-0.000964112	0.00120749	16
11.5	0.0181071	0.0012719	13		11.5	0.000229872	0.00114498	16
12	0.0173018	0.00125961	13		12	-0.000305697	0.00124774	16
12.5	0.0173058	0.001246	13		12.5	1.05871e-05	0.00117164	16
13	0.0168653	0.00114582	13		13	-1.0983e-05	0.00110372	16
13.5	0.0166856	0.00123533	13		13.5	0.000217435	0.00116321	16
14	0.0175416	0.001138	13		14	-0.000156395	0.00107178	16
14.5	0.0177261	0.00148878	13		14.5	0.000181572	0.00113123	16
15	0.0172927	0.00117289	13		15	0.000289504	0.00120461	16
15.5	0.0173257	0.00127583	13		15.5	-0.000477453	0.0012176	16
16	0.0175153	0.00112638	13		16	-3.24652e-05	0.00122888	16
16.5	0.0173191	0.00116916	13		16.5	-0.000307411	0.00110583	16
17	0.01692	0.00122356	13		17	-0.000638157	0.00121012	16
17.5	0.0164719	0.00129054	13		17.5	7.24381e-06	0.00121269	16
18	0.0169919	0.00115379	13		18	0.000111221	0.00109849	16
18.5	0.0161149	0.0011522	13		18.5	2.44512e-05	0.00109107	16
19	0.0172024	0.00118865	13		19	0.000203002	0.00102081	16
19.5	0.0168657	0.00119399	13		19.5	0.000767405	0.00108551	16
20	0.0166401	0.00113399	13		20	0.000309399	0.00109634	16
20.5	0.0159242	0.00115236	13		20.5	0.000165928	0.00105364	16
21	0.0150312	0.00102089	13		21	0.000191587	0.000979289	16
21.5	0.0152181	0.00104129	13		21.5	-0.000455855	0.00104684	16
22	0.0149297	0.00113392	13		22	-0.000683419	0.00117088	16
22.5	0.0150962	0.00155433	13		22.5	-0.000173925	0.00110655	16
23	0.0159257	0.00122597	13		23	0.000598526	0.000973931	16
23.5	0.0148368	0.00111081	13		23.5	0.000540955	0.000989925	16
24	0.0146439	0.00129738	13		24	0.000352638	0.00109509	16
24.5	0.0139869	0.00123007	13		24.5	0.000572863	0.000956651	16
25	0.0131778	0.00138875	13		25	0.00074642	0.00101671	16
25.5	0.0122434	0.0010607	13		25.5	0.000579998	0.00156271	8
26	0.0127056	0.0010575	13		26	0.000868162	0.00190932	8
26.5	0.0128098	0.00133872	13		26.5	0.000626575	0.00185392	8
27	0.0127711	0.00120582	13		27	0.000997802	0.00201953	8
27.5	0.0126369	0.00129645	13		27.5	0.000862348	0.00207318	8
28	0.0118142	0.0012374	13		28	0.000943292	0.00177416	8
28.5	0.0115714	0.000930445	13		28.5	0.000310692	0.00195568	8
29	0.00970643	0.0010875	13		29	4.33651e-05	0.00195284	8
29.5	0.0104002	0.00123977	13		29.5	0.000698637	0.00162336	8
30	0.00950157	0.00115485	13		30	-0.000356574	0.00202976	8
30.5	0.00907522	0.00121167	13		30.5	0.000424488	0.00166272	8
31	0.00822875	0.00109372	13		31	0.000497001	0.00191131	8
31.5	0.0082164	0.00124261	13		31.5	-0.000236824	0.00196962	8
32	0.00785337	0.000972663	13		32	0.000178804	0.00182622	8
32.5	0.00761488	0.000957268	13		32.5	-9.57854e-05	0.00171158	8
33	0.00748628	0.00123165	13		33	0.000247568	0.00157224	8
33.5	0.00739437	0.00124983	13		33.5	0.000417258	0.00189334	8
34	0.00666866	0.00129867	13		34	0.000839118	0.00164159	8
34.5	0.00664805	0.00108082	13		34.5	0.000467562	0.00177065	8
35	0.00571262	0.00128639	13		35	0.000604882	0.00174773	8
35.5	0.00624242	0.0013419	13		35.5	-4.14786e-05	0.0019853	8
36	0.00574628	0.00100026	13		36	-3.87925e-05	0.00155724	8
36.5	0.00505161	0.00123607	13		36.5	-0.000488281	0.00185852	8
37	0.00482776	0.00122839	13		37	0.000370012	0.00178586	8
37.5	0.00457715	0.000926423	13		37.5	-0.000688256	0.00168577	8
38	0.00459378	0.00109978	13		38	0.000141073	0.00201791	8
38.5	0.00611773	0.00130005	13		38.5	-0.000598402	0.00180077	8
39	0.00406204	0.00106377	13		39	0.000178548	0.00205104	8
39.5	0.00386785	0.00105708	13		39.5	0.000263765	0.0018987	8
40	0.00461966	0.00124188	13		40	-0.00025737	0.00211555	8
40.5	0.0046347	0.00101418	13		40.5	-0.00073489	0.00200837	8
41	0.00403883	0.00110377	13		41	-0.000447048	0.00208885	8
41.5	0.00407184	0.00116465	13		41.5	0.000505192	0.00213609	8
42	0.00445716	0.00128509	13		42	0.000542753	0.00208749	8
42.5	0.00385456	0.000839998	13		42.5	-0.000251492	0.00220741	8
43	0.00427114	0.00129543	13		43	0.000118473	0.00175572	8
43.5	0.00380495	0.0012363	13		43.5	0.000312582	0.00191623	8
44	0.00362319	0.00106557	13		44	-0.000907909	0.00187465	8
44.5	0.00393143	0.00122659	13		44.5	1.81886e-05	0.00215628	8
45	0.00404379	0.00128182	13		45	-0.000437465	0.00201003	8
45.5	0.00390884	0.00115775	13		45.5	-3.66923e-05	0.00178046	8
46	0.00350239	0.00123691	13		46	3.91313e-06	0.00200369	8
46.5	0.0034147	0.00113275	13		46.5	-8.26284e-05	0.00181836	8
47	0.00278616	0.0012476	13		47	0.00112765	0.00166343	8
47.5	0.00327759	0.00106206	13		47.5	0.000595209	0.00197746	8
48	0.00399431	0.00115697	13		48	0.000538353	0.00184358	8
48.5	0.00315238	0.00128089	13		48.5	0.000463261	0.0019982	8
49	0.00316765	0.00110906	13		49	-7.7012e-05	0.0021857	8
49.5	0.00325718	0.00139726	13		49.5	9.01384e-05	0.00183443	8
50	0.00274601	0.000879041	13		50	0.00148886	0.00218433	8
					50.5	0.0015819	0.00185601	8
					51	0.00129733	0.00194312	8
					51.5	0.0010694	0.00191887	8
					52	0.000506699	0.00177224	8
					52.5	0.0015042	0.00187151	8
					53	0.00137065	0.00165417	8

## Sheet: Figure 2a EKAR summary
Venus-cpVenus FLARE EKAR
Magnitude of Responses			Table Analyzed	Venus-cpVenus EKAR summary
WT	TA
0.0142691	0.00360558		Column B	TA
0.0196033	0.00136442		vs.	vs.
0.0187588	0.00112645		Column A	WT
0.0200838	-0.0034777
0.0231546	0.00114994		Unpaired t test
0.0166922	0.00206923		P value	<0.0001
0.0182865	0.00808219		P value summary	****
0.0211145	-0.0064945		Significantly different (P < 0.05)?	Yes
0.0188029	0.00288805		One- or two-tailed P value?	Two-tailed
0.0166795	0.00254104		t, df	t=10.64 df=27
0.016153	0.00515123
0.00549251	-0.00366739		How big is the difference?
0.0180363	-0.00132915		Mean ± SEM of column A	0.01747 ± 0.001182, n=13
	-0.00811231		Mean ± SEM of column B	0.0004623 ± 0.001073, n=16
	-0.00131746		Difference between means	-0.01701 ± 0.001598
	0.00381692		95% confidence interval	-0.02029 to -0.01373
			R squared (eta squared)	0.8075

## Sheet: Figure 2 Supp 1c EKAR variants
FLARE EKARs
mVen-cpVen	mCh-mCh	mCer3-mCer3
0.0142691	0.00459545	0.0129425
0.0196033	0.00508884	0.010782
0.0187588	0.00513634	0.00864879
0.0200838	0.00675302	0.0109268
0.0231546	0.00489823	0.0158854
0.0166922	0.00459325	0.0163405
0.0182865	0.00827061	0.0156397
0.0211145	0.00216765	0.0162587
0.0188029	0.00203542	0.0114838
0.0166795	0.00154155
0.016153
0.00549251
0.0180363

## Sheet: Figure 2b CKAR time course
Venus-cpVenus FLARE CKAR
	Wild Type				TA Mutant
Time (min)	Mean	SEM	N		Time (min)	Mean	SEM	N
-3	-0.00153139	0.000363165	26		-2.66667	0.00150109	0.000226946	119
-2.66667	-0.00101543	0.000364629	26
-2.33333	-0.00109422	0.000282487	26		-2.33333	0.000790212	0.000190301	119
-2	-0.00180954	0.000325668	26
-1.66667	-0.00102764	0.000369658	26		-2	0.000975553	0.000177316	119
-1.33333	-0.000689971	0.00029431	26
-1	-0.000681399	0.00024521	26		-1.66667	0.000924655	0.000156025	119
-0.666667	-0.000763206	0.00028985	26
-0.333333	-0.000828597	0.000373816	26		-1.33333	0.000674572	0.000148511	119
0	0	0	26
0.333333	0.000505496	0.000251867	26		-1	0.000650795	0.000128431	119
0.666667	0.00298615	0.00034597	26
1	0.00307487	0.000554382	26		-0.666667	0.00030506	0.000103967	119
1.33333	0.00482103	0.00041373	26
1.66667	0.00669874	0.000441539	26		-0.333333	0.000126709	7.32639e-05	119
2	0.00722003	0.000399066	26
2.33333	0.00799962	0.00048132	26		0	0	0	119
2.66667	0.00874206	0.000519147	26
3	0.00826911	0.000608012	26		0.333333	3.76757e-05	8.77328e-05	119
3.33333	0.00902689	0.000632896	26
3.66667	0.00995025	0.000654678	26		0.666667	-0.000286961	0.000104215	119
4	0.0104919	0.000675033	26
4.33333	0.0108748	0.000690729	26		1	-0.000160837	0.00011802	119
4.66667	0.0106449	0.000747889	26
5	0.0115219	0.000723353	26		1.33333	-0.000269526	0.000123587	119
5.33333	0.0117143	0.000758087	26
5.66667	0.012855	0.000672731	26		1.66667	-0.000489517	0.000141145	119
6	0.0140549	0.000659065	26
6.33333	0.0135966	0.000747914	26		2	-0.000685248	0.00015013	119
6.66667	0.0152011	0.000619477	26
7	0.0140834	0.000781582	26		2.33333	-0.00099814	0.000160291	119
7.33333	0.0152391	0.000698211	26
7.66667	0.0147214	0.000751165	26		2.66667	-0.00101009	0.000168213	119
8	0.0159035	0.000725529	26
8.33333	0.0155045	0.000760491	26		3	-0.00136813	0.0001802	119
8.66667	0.0163271	0.000724161	26
9	0.0161367	0.000747845	26		3.33333	-0.00121248	0.000193916	119
9.33333	0.0166582	0.000686653	26
9.66667	0.0169042	0.000749025	26
10	0.0169896	0.000680965	26
10.3333	0.0176282	0.000633252	26		4	-0.00149664	0.000200016	119
10.6667	0.0169364	0.000758848	26
11	0.017393	0.000755286	26		4.33333	-0.00136721	0.000198476	119
11.3333	0.0173646	0.000758922	26
11.6667	0.0176823	0.000773654	26		4.66667	-0.00119616	0.000217387	119
					5	-0.00136509	0.000212885	119
					5.33333	-0.00122271	0.000221405	119
					5.66667	-0.001069	0.000228133	119
					6	-0.00113572	0.000232605	119
					6.33333	-0.00130897	0.000242007	119
					6.66667	-0.00105243	0.000247331	119
					7	-0.00102977	0.000254299	119
					7.33333	-0.00111546	0.000263132	119
					7.66667	-0.0011298	0.000261807	119
					8	-0.000942674	0.000268786	119
					8.33333	-0.000946176	0.000277836	119
					8.66667	-0.000774202	0.000273268	119
					9	-0.000989616	0.000272674	119
					9.33333	-0.00103514	0.000274037	119
					9.66667	-0.000968729	0.000271076	119
					10	-0.000911315	0.000272754	119
					10.3333	-0.000716122	0.000274097	119
					10.6667	-0.00103788	0.000270782	119
					11	-0.0009574	0.000278124	119
					11.3333	-0.000763686	0.000283344	119
					11.6667	-0.000976741	0.000286567	119
					12	-0.000667205	0.000294638	119
					12.3333	-0.000671397	0.000300435	119
					12.6667	-0.000957071	0.000304763	119
					13	-0.00101447	0.000309623	119
					13.3333	-0.000994462	0.000302365	119
					13.6667	-0.000853918	0.000318781	119
					14	-0.000997293	0.000310394	119
					14.3333	-0.000605872	0.000318857	119
					14.6667	-0.000749151	0.000311367	119
					15	-0.000709808	0.000323142	119
					15.3333	-0.000751136	0.000321934	119
					15.6667	-0.000693291	0.000319807	119
					16	-0.000752217	0.000322473	119
					16.3333	-0.000522691	0.000332094	119

## Sheet: Figure 2b CKAR Summary
Venus-cpVenus FLARE CKAR
Magnitude of Responses		negative Δanisotropy
WT	TA
0.0185369	0.00163032			Table Analyzed	Venus-cpVenus CKAR summary
0.0199009	-0.00178112
0.0236091	-9.26247e-05			Column B	TA
0.0220321	0.000140065			vs.	vs.
0.0163381	0.000206497			Column A	WT
0.013825	-0.00361605
0.0163356	-0.00470904			Unpaired t test
0.0167915	-0.00178569			P value	<0.0001
0.0174032	-0.00162933			P value summary	****
0.0202207	-0.00194026			Significantly different (P < 0.05)?	Yes
0.022557	-0.00533497			One- or two-tailed P value?	Two-tailed
0.0190779	0.000920143			t, df	t=33.59 df=143
0.0200651	0.000838349
0.0225995	-0.00117888			How big is the difference?
0.0235532	-0.00199605			Mean ± SEM of column A	0.01828 ± 0.0006976, n=26
0.0205008	-0.000711863			Mean ± SEM of column B	-0.001988 ± 0.0002378, n=119
0.0185878	-0.00132795			Difference between means	-0.02026 ± 0.0006033
0.0178667	0.00036203			95% confidence interval	-0.02146 to -0.01907
0.00909505	4.52018e-05			R squared (eta squared)	0.8875
0.0181963	-0.000869466
0.0165851	-0.00210851			F test to compare variances
0.0195309	-0.000462286			F, DFn, Dfd	1.879, 25, 118
0.0194252	0.00106101			P value	0.0264
0.0155496	0.00141598			P value summary	*
0.0103431	-0.000178138			Significantly different (P < 0.05)?	Yes
0.016662	0.00288563
	-0.00435823
	-0.00539464
	-0.00592936
	-0.00370929
	-0.000333561
	0.000206862
	-0.00540592
	-0.00596434
	-0.00235534
	-0.00178134
	-0.00281902
	-0.0017675
	0.00211
	-0.00077307
	0.00151807
	-0.00102081
	0.00346527
	-0.00117905
	-0.0013047
	-0.00202743
	-0.00056707
	-0.00191858
	-0.00199176
	-0.00438775
	-0.00419222
	-0.00076011
	-0.00121675
	-0.00313146
	-0.000885715
	-0.00201787
	-0.0013268
	-0.00159752
	-0.00250481
	-0.00257232
	-0.00363984
	-0.00134064
	-0.00182212
	-0.00112187
	-0.000722036
	-0.00104986
	-0.00200157
	-0.00399992
	-0.00201854
	-0.00118581
	-0.00135897
	-0.000743641
	0.000975448
	0.00102144
	-0.00266671
	-0.00185105
	-0.00287464
	-0.00171905
	0.00267086
	-0.00235547
	0.00137878
	-0.0015859
	0.00296277
	-0.000811984
	-0.00137393
	-0.00665653
	-0.00657598
	-0.00374004
	-0.00799274
	-0.0021761
	-0.0031061
	-0.00155733
	-0.00147962
	-0.00724739
	0.000510313
	6.87825e-05
	-0.00166974
	-0.00154107
	-0.000659558
	0.00208609
	-0.0117438
	-0.0069946
	-0.00511202
	-0.00274408
	-0.00107617
	8.13259e-05
	-0.00198479
	-0.00339761
	-0.0030709
	-0.00490341
	-0.00502967
	-0.0048566
	-0.00367142
	-0.00410683
	-0.00110711
	-0.0020409
	-0.0064732
	-0.0112113
	-0.000103432

## Sheet: Figure 2 Supp2 heteroFRET CKAR
	CKAR 1				CKAR 2
Time	C/Y emission ratio (normalized)	SEM			Time	Y/C emission ratio (normalized)	SEM
-4	0.997098	0.000785613			-4	1.00991	0.00546511
-3.5	0.997002	0.00113889			-3.5	1.00521	0.00423686
-3	0.997986	0.00091523			-3	1.00571	0.00375132
-2.5	0.997904	0.00082283			-0.25	1.00265	0.00326352
-2	0.996832	0.000927771			-0.2	1.00279	0.00290075
-1	1.00013	0.000769073			-1.5	1.0034	0.0028388
-0.5	0.998995	0.000860313			-1	1.00143	0.000966299
0	1	0			-0.5	1.00198	0.0015066
0.5	1.0017	0.000846629			0	1	0
1	1.00827	0.0029934			0.5	1.00026	0.00123486
1.5	1.01627	0.00408667			1	1.02025	0.00418185
2	1.02269	0.00485849			1.5	1.06036	0.0148197
2.5	1.0279	0.00460554			2	1.09892	0.0236934
3	1.0328	0.00403102			2.5	1.12656	0.0304907
3.5	1.03625	0.00364058			3	1.15139	0.0316324
4	1.04195	0.00312368			3.5	1.16955	0.0349763
4.5	1.04351	0.00287195			4	1.18532	0.0367313
5	1.04895	0.00324771			4.5	1.19863	0.037432
5.5	1.05244	0.00270553			5	1.21124	0.0389396
6	1.05561	0.00278241			5.5	1.22485	0.0367463
6.5	1.05698	0.00195871			6	1.23228	0.0372647
7	1.06246	0.0028191			6.5	1.2407	0.0356536
7.5	1.06585	0.00363041			7	1.24809	0.0353231
8	1.0698	0.0048133			7.5	1.25739	0.0337645
8.5	1.07275	0.00452729			8	1.26672	0.0332321
9	1.07468	0.00506059			8.5	1.27829	0.02841
9.5	1.07856	0.00582001			9	1.28524	0.0259025
10	1.08051	0.0062321			9.5	1.30021	0.0199205
10.5	1.08301	0.00674766			10	1.3137	0.0155642
11	1.08629	0.00716008			10.5	1.32101	0.0120551
11.5	1.08814	0.00722326			11	1.33134	0.0117421
12	1.09055	0.00757842			11.5	1.33567	0.0124943
12.5	1.09349	0.00773444			12	1.34351	0.0114734
13	1.09324	0.00828358			12.5	1.34879	0.0115946
13.5	1.09712	0.00841851			13.5	1.36021	0.0131229
14	1.09978	0.00837684			14	1.3659	0.0137158
14.5	1.09972	0.00915511			14.5	1.36771	0.0120812
15	1.10323	0.00949674			15	1.37332	0.0137062
15.5	1.10415	0.00962892			15.5	1.3751	0.0131031
16	1.10506	0.00910972			16	1.3805	0.014578
16.5	1.10877	0.00994807			16.5	1.3825	0.0149852
17	1.11063	0.00944995			17	1.38789	0.0151784
17.5	1.11243	0.009834			17.5	1.38889	0.0150786
18	1.11209	0.00994833			18	1.39501	0.0167074
19	1.11559	0.0113988			18.5	1.39587	0.0163751
19.5	1.11813	0.0113251			19	1.396	0.014943
20	1.11964	0.0116288			19.5	1.40017	0.0171259
20.5	1.11987	0.0120123			20	1.40134	0.0181508
21	1.11936	0.0107277			20.5	1.40192	0.0162176
21.5	1.10605	0.0117063			21	1.4072	0.0189534
22	1.0683	0.0128857			21.5	1.40195	0.0174501
22.5	1.04546	0.0139406			22	1.25013	0.0282308
23	1.03347	0.0141872			22.5	1.12061	0.0374358
23.5	1.02813	0.0137655			23.5	1.04045	0.0237468
24	1.02553	0.013953			24	1.02539	0.0197099
24.5	1.02459	0.0141286			24.5	1.01847	0.0170759
25	1.02316	0.0140031			25	1.01487	0.0151717
25.5	1.02336	0.0148992			25.5	1.01363	0.0149693
26	1.0247	0.0135601			26	1.0107	0.0133654
26.5	1.02423	0.0145856			26.5	1.01023	0.0125824
27	1.02575	0.0138688			27	1.01102	0.0127052
					27.5	1.00911	0.0125355
					28	1.00982	0.0126576
					28.5	1.01022	0.012677
					29	1.00886	0.0128106
					29.5	1.0096	0.0127851
					30	1.00847	0.0121781
					30.5	1.0099	0.0127195
					31	1.01013	0.0127718
					31.5	1.00942	0.0121181

## Sheet: Figure 2 Supp3 CKAR summary
FLARE CKAR color variants			negative Δanisotropy
Venus-cp172Venus	mCh-mCh	Cer3-Cer3
0.0185369	0.0113124	0.00823609
0.0199009	0.00717493	0.00993515
0.0236091	0.00783336	0.0116424
0.0220321	0.00629618	0.00776402
0.0163381	0.00767831	0.0111532
0.013825	0.00568787	0.00986092
0.0163356	0.00521409	0.0107217
0.0167915	0.00569956	0.0120154
0.0174032		0.00927324
0.0202207		0.0110699
0.022557		0.00963886
0.0190779
0.0200651
0.0225995
0.0235532
0.0205008
0.0185878
0.0178667
0.00909505
0.0181963
0.0165851
0.0195309
0.0194252
0.0155496
0.0103431
0.016662

## Sheet: Figure 2c Time Course
FLARE MLCK	WT				Vehicle Control
Time	Δanisotropy	SEM	N		Time	Δanisotropy	SEM	N
-1.5	0.0010337	0.000783334	13		-1.5	0.000932086	0.000456577	10
-1.33333	0.00181805	0.00093669	13		-1.33333	-4.62867e-05	0.00033757	10
-1.16667	0.00185	0.000773965	13		-1.16667	4.24156e-05	0.000229437	10
-1	0.00115367	0.000957109	13		-1	-1.8667e-05	0.000193456	10
-0.833333	-0.000839829	0.000651549	13		-0.833333	-0.000182973	0.000225375	10
-0.666667	-0.000667161	0.000832693	13		-0.666667	0.00015185	0.000154685	10
-0.5	0.000894728	0.000810614	13		-0.5	-0.000312027	0.000305053	10
-0.333333	1.45683e-05	0.000357596	13		-0.333333	-0.000606255	0.000190643	10
-0.166667	-0.00029887	0.000705453	13		-0.166667	-0.000176289	0.000305642	10
0	0.000769651	0.000615678	13		0	0.000216131	0.000661707	10
0.166667	0.00565634	0.00272646	13		0.166667	0.000445879	0.000778433	10
0.333333	0.0149412	0.0030331	13		0.333333	0.000146643	0.000636369	10
0.5	0.0156956	0.00214078	13		0.5	0.000160599	0.000315969	10
0.666667	0.0151691	0.00230425	13		0.666667	-4.085e-05	0.000232962	10
0.833333	0.0154668	0.00208315	13		0.833333	-0.000145373	0.000166022	10
1	0.0140472	0.00196385	13		1	4.00023e-05	0.000510765	10
1.16667	0.0141628	0.00219446	13		1.16667	-0.000225154	0.000206	10
1.33333	0.0121333	0.00175928	13		1.33333	0.000178963	0.000314563	10
1.5	0.0103954	0.0022048	13		1.5	-0.000143869	0.0002597	10
1.66667	0.00906818	0.00133628	13		1.66667	-9.2544e-05	0.000485608	10
1.83333	0.00886085	0.00149899	13		1.83333	0.000461327	0.000741064	10
2	0.00754103	0.00152739	13		2	0.000347308	0.000732613	10
2.16667	0.00666119	0.00172837	13		2.16667	0.000868645	0.00113061	10
2.33333	0.00884468	0.00211001	13		2.33333	0.000491625	0.000878969	10
2.5	0.00603419	0.0011998	13		2.5	0.000525485	0.00062156	10
2.66667	0.00677596	0.00151197	13		2.66667	-1.1517e-06	0.000507904	10
2.83333	0.00564383	0.0013359	13		2.83333	-2.5934e-05	0.000559728	10
3	0.00480249	0.00133819	13		3	-0.000722973	0.00060364	10
3.16667	0.00558049	0.00128716	13		3.16667	-0.000663607	0.000534508	10
3.33333	0.00569858	0.00142432	13		3.33333	-0.000465471	0.000696957	10
3.5	0.00371555	0.00141828	13		3.5	-0.000449587	0.000624146	10
3.66667	0.00442526	0.00139721	13		3.66667	-0.000693691	0.000629752	10
3.83333	0.00467703	0.00159841	13		3.83333	6.5323e-05	0.000828443	10
4	0.00294823	0.00104774	13		4	0.00139591	0.0012419	10
4.16667	0.00268094	0.00124229	13		4.16667	0.00118429	0.00136451	10
4.33333	0.00405949	0.00150096	13		4.33333	0.000580169	0.000939978	10
4.5	0.00393343	0.00120955	13		4.5	0.000150619	0.000975489	10
4.66667	0.00171419	0.000972989	13		4.66667	-6.4556e-05	0.000801054	10
4.83333	0.00237495	0.00167874	13		4.83333	0.000188367	0.000563313	10
5	0.00158829	0.000988663	13		5	-0.000114454	0.000798778	10
5.16667	0.0015287	0.00135629	13		5.16667	-0.000306279	0.000742387	10
5.33333	0.00289468	0.00128822	13		5.33333	0.000711896	0.000892177	10
5.5	0.00124899	0.00105356	13		5.5	0.00132836	0.00115962	10
5.66667	0.000750452	0.000983962	13		5.66667	0.00136719	0.00108443	10
5.83333	0.000727322	0.00142091	13		5.83333	0.00103499	0.0010769	10
6	0.00283224	0.00129237	13		6	0.000496827	0.000883627	10
6.16667	0.00174628	0.0011178	13		6.16667	0.000474774	0.000800938	10
6.33333	0.000748851	0.00111189	13		6.33333	-0.000271116	0.00081271	10
6.5	0.000820514	0.00157908	13		6.5	0.0004461	0.000837539	10
6.66667	0.00106733	0.00179767	13		6.66667	-0.00046365	0.000845575	10
6.83333	0.000458744	0.00104669	13		6.83333	-0.000342899	0.000778485	10
7	0.00113577	0.00159264	13		7	0.00030178	0.000889794	10
7.16667	0.00205004	0.00145276	13		7.16667	-0.000306443	0.00082941	10
7.33333	0.000428225	0.00145253	13		7.33333	0.000183938	0.000749598	10
7.5	0.000602519	0.00156307	13		7.5	0.00018152	0.000819983	10
7.66667	0.0019901	0.00182036	13		7.66667	0.000246699	0.000771425	10
7.83333	0.00117954	0.00153428	13		7.83333	-0.000169531	0.000797962	10
8	0.00267405	0.0018402	13		8	-0.000506948	0.000700647	10
8.16667	-4.36778e-05	0.00134749	13		8.16667	-0.000880378	0.000736162	10
8.33333	-1.4112e-05	0.00126433	13		8.33333	-0.000867743	0.000653384	10

## Sheet: Figure 2c Summary
FLARE MLCK
Magnitude of Responses
0.0293244	-0.0012783		Column B	Ctrl
0.035571	-0.0019494		vs.	vs.
0.0282761	0.0051766		Column A	KCl
0.0138489	-0.000962394
0.0151627	0.000717906		Unpaired t test
0.0129645	-6.31604e-05		P value	<0.0001
0.0122686	-0.000151807		P value summary	****
0.0180979	-0.001398		Significantly different (P < 0.05)?	Yes
0.0128027	0.000511108		One- or two-tailed P value?	Two-tailed
0.0167072	0.000863889		t, df	t=7.543 df=21
0.0165401
0.0289771			How big is the difference?
0.0145692			Mean ± SEM of column A	0.01962 ± 0.0022, n=13
			Mean ± SEM of column B	0.0001466 ± 0.0006364, n=10
			Difference between means	-0.01948 ± 0.002582
			95% confidence interval	-0.02485 to -0.01411
			R squared (eta squared)	0.7304
