# Supplementary material for: Single-color, ratiometric biosensors for detecting signaling activities in live cells
Source: eLife. 2018 Jul 3;7:e35458. doi: 10.7554/eLife.35458 (PMC6037473; doi:10.7554/eLife.35458)
Supplement: Figure 3—source data 1. — (a) Sheet 1, Figure 3b. Time course for Venus-cp172Venus FLARE Cameleon. (b) Sheet 2, Figure 3b. Summary of magnitude of responses for Venus-cp172Venus FLARE Cameleon upon addition of calcium chloride and ionomycin. (c) Sheet 3, Figure 3—figure supplement 1b. Summary of magnitudes of responses for various FLARE Cameleon variants upon addition of calcium chloride and ionomycin. (d) Sheet 4, Figure 3—figure supplement 2. In vitro calibration of Venus-cp172Venus FLARE Cameleon, both raw data and sigmoidal curve fits. (e) Sheet 5, Figure 3—figure supplement 3. Summary of magnitude of anisotropy changes for CFP FLARE D1ER upon addition of ionomycin and three different doses of calcium. (f) Sheet 6, Figure 3c. Time course for Venus-cp172Venus FLARE ICUE. (g) Sheet 7, Figure 3c Summary of magnitudes of changes in anisotropy for Venus-cp172Venus FLARE ICUE upon addition of forskolin and IBMX. [file elife-35458-fig3-data1.xlsx]

## Sheet: Figure 3b cameleon time course
Venus-cpVenus FLARE cameleon
Time (min)	Negative Δanisotropy	SEM	N
-3.5	0.000608286	0.001228	10
-3	0.000468154	0.00172641	10
-2.5	0.000147311	0.00128251	10
-2	-0.000252346	0.000834186	10
-1.5	0.000895568	0.000638742	10
-1	0.00175529	0.00128392	10
-0.5	0.000442726	0.000576092	10
0	0	0	10
	0.283163	0.00312519	4
1	0.0203008	0.000844828	10
1.5	0.0251768	0.000930481	10
2	0.0264542	0.0012131	10
2.5	0.0244593	0.00119583	10
3	0.0247487	0.00166871	10
3.5	0.0250691	0.00171637	10
4	0.0265335	0.00146376	10
4.5	0.0264047	0.00124883	10
5	0.0245785	0.0019441	10
5.5	0.0269264	0.00149588	10
6	0.0264661	0.00141363	10
6.5	0.0265474	0.00161647	10
7	0.0272952	0.00138897	10
7.5	0.0279597	0.00136113	10
8	0.0273784	0.00183898	10
8.5	0.0266423	0.00227518	10
9	0.0262481	0.00226821	10
9.5	0.0268046	0.00281433	10
10	0.0270692	0.00210485	10
10.5	0.0270113	0.00235047	10
11	0.0273637	0.00236873	10
11.5	0.0288546	0.00313115	10
12	0.0270486	0.00278155	10
12.5	0.0280177	0.00222149	10
13	0.0279817	0.0029433	10
13.5	0.0288827	0.00309799	10
14	0.027386	0.00271971	10
14.5	0.0286312	0.00226479	10
15	0.0296199	0.00262728	10
15.5	0.0281722	0.00263215	10
16	0.0288843	0.00284219	10
16.5	0.0305565	0.00222854	10
17	0.0285648	0.00225703	10
17.5	0.0297239	0.002831	10
18	0.0292238	0.00254529	10
18.5	0.0292127	0.00224873	10
19	0.0289973	0.00280773	10

## Sheet: Figure 3b cameleon summary
Venus-cpVenus FLARE cameleon
Magnitude of Responses		Negative Δanisotropy
0.0350126
0.0279911
0.0281779
0.023434
0.0279106
0.0276031
0.026247
0.0230534
0.0223376
0.020629

## Sheet: Figure 3 Supp 1 cameleon var 
FLARE cameleons		Negative Δanisotropy
Venus-cp172Venus	Venus-Venus	Cer3-Cer3	mCherry-mCherry
0.0350126	0.0144652	0.00823609	0.0034468
0.0279911	0.0203991	0.00993515	0.00683157
0.0281779	0.0180092	0.0116424	0.0049581
0.023434	0.0211233	0.00776402	0.0025248
0.0279106	0.0190038	0.0111532	7.79694e-05
0.0276031	0.0222104	0.00986092	0.00203278
0.026247	0.0149037	0.0107217	0.00456196
0.0230534		0.0120154	0.00287493
0.0223376		0.00927324	0.00425727
0.020629		0.0110699	0.00281444
		0.00963886	0.000562623
			0.00609618
			0.0030307
			0.00525028
			0.00172953
			0.00548536
			-0.00110585
			0.00219938
			0.00556612
			0.0015352
			0.00117156
			0.00466758
			0.00366505

## Sheet: Figure 3 Supp 2 Ca calibration
Data									Fit
25 deg			32 deg			37 deg			25 deg			32 deg			37 deg
Ca concentration	Anisotropy		Ca concentration	Anisotropy		Ca concentration	Anisotropy		Ca concentration	Anisotropy		Ca concentration	Anisotropy		Ca concentration	Anisotropy
1	0.231829		1	0.231058					1	0.231829		1	0.231052		1	0.222368
21.66	0.232216		19.4	0.228499		1	0.222368		2	0.231829		2	0.231039		2	0.222368
48.74	0.229474		43.65	0.228701		18.02	0.223566		3	0.231829		3	0.231021		3	0.222368
83.56	0.233051		74.84	0.223329		40.56	0.222192		4	0.231828		4	0.231		4	0.222368
129.9	0.228439		116.4	0.221808		69.53	0.218615		5	0.231828		5	0.230976		5	0.222368
194.9	0.217932		174.6	0.22051		108.1	0.217556		10	0.231821		10	0.230811		10	0.222365
292.4	0.214881		261.9	0.214067		162.2	0.21012		20	0.231781		20	0.230327		20	0.222336
454.9	0.207376		407.4	0.209713		243.3	0.20297		30	0.231695		30	0.229695		30	0.222248
779.8	0.201691		698.4	0.201754		378.6	0.201375		40	0.23155		40	0.228962		40	0.222064
1750	0.201326		1570	0.200445		1450	0.199534		50	0.231338		50	0.228157		50	0.221751
44550	0.201078		42190	0.201567		40690	0.200068		60	0.231054		60	0.227305		60	0.221277
									70	0.230693		70	0.226427		70	0.220625
									80	0.230254		80	0.225537		80	0.219789
									90	0.229738		90	0.224647		90	0.218781
									100	0.229147		100	0.223767		100	0.217631
									120	0.227764		120	0.222063		120	0.215061
									120	0.227764		120	0.222063		120	0.215061
									130	0.226986		130	0.221248		130	0.213734
									140	0.226161		140	0.220462		140	0.212433
									150	0.225299		150	0.219707		150	0.21119
									160	0.224409		160	0.218982		160	0.210027
									170	0.223501		170	0.21829		170	0.208958
									180	0.222583		180	0.217628		180	0.207988
									190	0.221665		190	0.216997		190	0.207116
									200	0.220753		200	0.216397		200	0.20634
									220	0.218973		220	0.215281		220	0.205044
									230	0.218115		230	0.214764		230	0.204509
									240	0.217283		240	0.214273		240	0.204038
									250	0.216481		250	0.213806		250	0.203624
									260	0.21571		260	0.213362		260	0.20326
									270	0.214972		270	0.21294		270	0.20294
									280	0.214266		280	0.212539		280	0.202657
									290	0.213595		290	0.212157		290	0.202408
									300	0.212956		300	0.211794		300	0.202187
									310	0.212351		310	0.211449		310	0.201992
									320	0.211777		320	0.21112		320	0.201818
									330	0.211235		330	0.210807		330	0.201664
									340	0.210722		340	0.210508		340	0.201526
									350	0.210238		350	0.210224		350	0.201403
									360	0.209781		360	0.209952		360	0.201293
									370	0.20935		370	0.209694		370	0.201194
									380	0.208944		380	0.209446		380	0.201105
									390	0.208562		390	0.20921		390	0.201025
									400	0.208201		400	0.208984		400	0.200953
									410	0.207861		410	0.208769		410	0.200887
									420	0.207541		420	0.208562		420	0.200827
									430	0.207239		430	0.208365		430	0.200773
									440	0.206954		440	0.208175		440	0.200724
									450	0.206685		450	0.207994		450	0.200679
									460	0.206432		460	0.20782		460	0.200638
									470	0.206193		470	0.207653		470	0.200601
									480	0.205967		480	0.207493		480	0.200566
									490	0.205754		490	0.207339		490	0.200535
									500	0.205553		500	0.207192		500	0.200506
									510	0.205363		510	0.20705		510	0.200479
									520	0.205183		520	0.206913		520	0.200454
									530	0.205012		530	0.206782		530	0.200432
									540	0.204851		540	0.206656		540	0.200411
									550	0.204699		550	0.206534		550	0.200391
									560	0.204554		560	0.206417		560	0.200373
									570	0.204417		570	0.206304		570	0.200356
									580	0.204287		580	0.206195		580	0.200341
									590	0.204163		590	0.20609		590	0.200326
									600	0.204046		600	0.205989		600	0.200313
									650	0.20354		650	0.205531		650	0.200257
									700	0.203143		700	0.205144		700	0.200217
									750	0.202828		750	0.204813		750	0.200187
									800	0.202575		800	0.204529		800	0.200165
									850	0.202369		850	0.204282		850	0.200148
									900	0.202199		900	0.204066		900	0.200134
									950	0.202059		950	0.203876		950	0.200124
									1000	0.201942		1000	0.203708		1000	0.200115
									1050	0.201843		1050	0.203559		1050	0.200108
									1100	0.201759		1100	0.203426		1100	0.200103
									1150	0.201687		1150	0.203307		1150	0.200098
									1200	0.201626		1200	0.203199		1200	0.200094
									1250	0.201572		1250	0.203102		1250	0.200091
									1300	0.201526		1300	0.203014		1300	0.200088
									1350	0.201485		1350	0.202933		1350	0.200086
									1400	0.201449		1400	0.20286		1400	0.200084
									1450	0.201418		1450	0.202793		1450	0.200082
									1500	0.20139		1500	0.202731		1500	0.200081
									1550	0.201365		1550	0.202674		1550	0.200079
									1600	0.201343		1600	0.202622		1600	0.200078
									1650	0.201323		1650	0.202573		1650	0.200077
									1700	0.201305		1700	0.202528		1700	0.200076
									1750	0.201289		1750	0.202486		1750	0.200076
									1800	0.201274		1800	0.202447		1800	0.200075
									1850	0.201261		1850	0.20241		1850	0.200074
									1900	0.201249		1900	0.202376		1900	0.200074
									1950	0.201238		1950	0.202345		1950	0.200073
									2000	0.201228		2000	0.202315		2000	0.200073
									2050	0.201219		2050	0.202287		2050	0.200073
									2100	0.201211		2100	0.20226		2100	0.200072
									2150	0.201203		2150	0.202235		2150	0.200072
									2200	0.201196		2200	0.202212		2200	0.200072
									2250	0.201189		2250	0.20219		2250	0.200071
									2300	0.201183		2300	0.202169		2300	0.200071
									2350	0.201178		2350	0.202149		2350	0.200071
									2400	0.201172		2400	0.20213		2400	0.200071
									2450	0.201167		2450	0.202112		2450	0.200071
									2500	0.201163		2500	0.202095		2500	0.20007
									2550	0.201159		2550	0.202079		2550	0.20007
									2600	0.201155		2600	0.202064		2600	0.20007
									2650	0.201151		2650	0.202049		2650	0.20007
									2700	0.201148		2700	0.202036		2700	0.20007
									2750	0.201145		2750	0.202022		2750	0.20007
									2800	0.201142		2800	0.20201		2800	0.20007
									2850	0.201139		2850	0.201997		2850	0.20007
									2900	0.201136		2900	0.201986		2900	0.20007
									2950	0.201134		2950	0.201975		2950	0.200069
									3000	0.201131		3000	0.201964		3000	0.200069
									3050	0.201129		3050	0.201954		3050	0.200069
									3100	0.201127		3100	0.201944		3100	0.200069
									3150	0.201125		3150	0.201935		3150	0.200069
									3200	0.201123		3200	0.201926		3200	0.200069
									3250	0.201122		3250	0.201917		3250	0.200069
									3300	0.20112		3300	0.201909		3300	0.200069
									3350	0.201118		3350	0.201901		3350	0.200069
									3400	0.201117		3400	0.201893		3400	0.200069
									3450	0.201115		3450	0.201886		3450	0.200069
									3500	0.201114		3500	0.201879		3500	0.200069
									3550	0.201113		3550	0.201872		3550	0.200069
									3600	0.201111		3600	0.201865		3600	0.200069
									3650	0.20111		3650	0.201859		3650	0.200069
									3700	0.201109		3700	0.201853		3700	0.200069
									3750	0.201108		3750	0.201847		3750	0.200069
									3800	0.201107		3800	0.201841		3800	0.200069
									3850	0.201106		3850	0.201835		3850	0.200069
									3900	0.201105		3900	0.20183		3900	0.200069
									3950	0.201104		3950	0.201825		3950	0.200069
									4000	0.201104		4000	0.20182		4000	0.200069
									4050	0.201103		4050	0.201815		4050	0.200069
									4100	0.201102		4100	0.20181		4100	0.200069
									4150	0.201101		4150	0.201805		4150	0.200069
									4200	0.201101		4200	0.201801		4200	0.200068
									4250	0.2011		4250	0.201797		4250	0.200068
									4300	0.201099		4300	0.201792		4300	0.200068
									4350	0.201099		4350	0.201788		4350	0.200068
									4400	0.201098		4400	0.201784		4400	0.200068
									4450	0.201098		4450	0.201781		4450	0.200068
									4500	0.201097		4500	0.201777		4500	0.200068
									4550	0.201096		4550	0.201773		4550	0.200068
									4600	0.201096		4600	0.20177		4600	0.200068
									4650	0.201095		4650	0.201766		4650	0.200068
									4700	0.201095		4700	0.201763		4700	0.200068
									4750	0.201095		4750	0.20176		4750	0.200068
									4800	0.201094		4800	0.201757		4800	0.200068
									4850	0.201094		4850	0.201753		4850	0.200068
									4900	0.201093		4900	0.20175		4900	0.200068
									4950	0.201093		4950	0.201747		4950	0.200068
									5000	0.201093		5000	0.201745		5000	0.200068
									5050	0.201092		5050	0.201742		5050	0.200068
									5100	0.201092		5100	0.201739		5100	0.200068
									5150	0.201091		5150	0.201737		5150	0.200068
									5200	0.201091		5200	0.201734		5200	0.200068
									5250	0.201091		5250	0.201732		5250	0.200068
									5300	0.201091		5300	0.201729		5300	0.200068
									5350	0.20109		5350	0.201727		5350	0.200068
									5400	0.20109		5400	0.201724		5400	0.200068
									5450	0.20109		5450	0.201722		5450	0.200068
									5500	0.201089		5500	0.20172		5500	0.200068
									5550	0.201089		5550	0.201718		5550	0.200068
									5600	0.201089		5600	0.201715		5600	0.200068
									5650	0.201089		5650	0.201713		5650	0.200068
									5700	0.201088		5700	0.201711		5700	0.200068
									5750	0.201088		5750	0.201709		5750	0.200068
									5800	0.201088		5800	0.201708		5800	0.200068
									5850	0.201088		5850	0.201706		5850	0.200068
									5900	0.201088		5900	0.201704		5900	0.200068
									5950	0.201087		5950	0.201702		5950	0.200068
									6000	0.201087		6000	0.2017		6000	0.200068
									6050	0.201087		6050	0.201698		6050	0.200068
									6100	0.201087		6100	0.201697		6100	0.200068
									6150	0.201087		6150	0.201695		6150	0.200068
									6200	0.201086		6200	0.201693		6200	0.200068
									6250	0.201086		6250	0.201692		6250	0.200068
									6300	0.201086		6300	0.20169		6300	0.200068
									6350	0.201086		6350	0.201689		6350	0.200068
									6400	0.201086		6400	0.201687		6400	0.200068
									6450	0.201086		6450	0.201686		6450	0.200068
									6500	0.201085		6500	0.201684		6500	0.200068
									10000	0.20108		10000	0.201626		10000	0.200068
									13500	0.201079		13500	0.201604		13500	0.200068
									17000	0.201079		17000	0.201593		17000	0.200068
									20500	0.201078		20500	0.201586		20500	0.200068
									24000	0.201078		24000	0.201582		24000	0.200068
									27500	0.201078		27500	0.201579		27500	0.200068
									31000	0.201078		31000	0.201577		31000	0.200068
									34500	0.201078		34500	0.201575		34500	0.200068
									38000	0.201078		38000	0.201574		38000	0.200068
									41500	0.201078		41500	0.201573		41500	0.200068
									45000	0.201078		45000	0.201572		45000	0.200068
									48500	0.201078		48500	0.201572		48500	0.200068
									52000	0.201078		52000	0.201571		52000	0.200068
									55500	0.201078		55500	0.201571		55500	0.200068
									59000	0.201078		59000	0.201571		59000	0.200068
									62500	0.201078		62500	0.20157		62500	0.200068
									66000	0.201078		66000	0.20157		66000	0.200068
									69500	0.201078		69500	0.20157		69500	0.200068
									73000	0.201078		73000	0.20157		73000	0.200068
									76500	0.201078		76500	0.201569		76500	0.200068
									80000	0.201078		80000	0.201569		80000	0.200068
									83500	0.201078		83500	0.201569		83500	0.200068
									87000	0.201078		87000	0.201569		87000	0.200068
									90500	0.201078		90500	0.201569		90500	0.200068
									94000	0.201078		94000	0.201569		94000	0.200068
									97500	0.201078		97500	0.201569		97500	0.200068
															100000	0.200068

## Sheet: Figure 3 Supp 4 D1ER
CFP FLARE D1ER
0 μM	100 μM	10 mM
-0.0314075	0.0238864	0.0655432
-0.0131226	0.0305254	0.0528272
-0.00472885	0.00991955	0.0421043
0.0271149	-0.00791545	0.0374954
0.019556	0.0125614	0.0490628
0.00466615	-0.000239352	0.0422372
0.00435885	0.0632188	0.0410599
0.00566515	-0.000754452	0.0346243
0.0149061	0.0204787	0.042846
-0.0155975	0.0171493	0.0485295
-0.0110545	0.022923	0.0414298
-0.00292915	0.0130382	0.0385243
0.000162648	0.0312352	0.0415935
-0.00664845	0.0280581	0.0347877
0.00349405	0.028477	0.0442229
0.00410115	0.025716	0.0425485
-0.00768375	0.00921955	0.034306
-0.0150034	0.0197939	0.0588468
0.00679125	0.0351549	0.0442785
-0.000155052	0.00610875	0.049662
0.019596	0.0212102	0.0315368
0.00416935	-0.00103105	0.0393852
0.0126067	0.0186976	0.041564
-0.0248182	-0.026051	0.0546174
0.00596075		0.0351352
		0.055303
		0.0288819
		0.0345227
		0.00825905
		0.0383296
		0.0584868
		0.0572469

## Sheet: Figure 3b ICUE time course
Venus-cpVenus ICUE
Time (min)	Δanisotropy	SEM	N
-4	-0.000260935	0.000247337	40
-3.5	-0.000583587	0.000201483	40
-3	-0.000189127	0.000275999	40
-2.5	-0.000288702	0.000205233	40
-2	-0.000337624	0.000281865	40
-1.5	-0.000384136	0.000190079	40
-1	-0.000145509	0.000269831	40
-0.5	-0.00065628	0.00031045	40
0	0	0	40
0.5	-0.000468705	0.000238866	40
1	0.00198506	0.000288487	40
1.5	0.00462028	0.000415812	40
2	0.0077192	0.000536054	40
2.5	0.00989991	0.000577583	40
3	0.0119427	0.000633736	40
3.5	0.0131733	0.000570614	40
4	0.0139793	0.000549934	40
4.5	0.0148719	0.000548833	40
5	0.0152392	0.000498487	40
5.5	0.0152261	0.000479024	40
6	0.0154751	0.000461955	40
6.5	0.0159802	0.000528249	40
7	0.0163305	0.000550448	40

## Sheet: Figure 3b ICUE summary
Venus-cpVenus FLARE ICUE
Magnitude of Responses		Δanisotropy
0.0131146
0.0111861
0.00753569
0.0177662
0.018084
0.0156068
0.0115094
0.0156575
0.0208751
0.0157998
0.0147661
0.0151822
0.0139185
0.0108762
0.0165709
0.015103
0.0204969
0.0199416
0.0200864
0.0197845
0.0227098
0.021823
0.0228618
0.0267637
0.013237
0.0129302
0.0104328
0.0140585
0.0131913
0.0158976
0.0137966
0.0175806
0.0200656
0.0172951
0.01763
0.0171289
0.0153649
0.014989
0.0162515
0.0146678
0.0188655
0.0204566
0.0185703
0.0197834
0.0106921
0.0164876
0.0168731
0.0193894
0.0218774
