# Supplementary material for: Single-color, ratiometric biosensors for detecting signaling activities in live cells
Source: eLife. 2018 Jul 3;7:e35458. doi: 10.7554/eLife.35458 (PMC6037473; doi:10.7554/eLife.35458)
Supplement: Figure 4—source data 1. — (a) Sheet 1, Figure 4a. Time course for multiplexed imaging of mCherry-mCherry FLARE AKAR, Venus-cp172Venus FLARE EKAR, and mCer3-mCer3 FLARE Cameleon, expressed in HEK293T cells and treated with forskolin and IBMX, EGF, and thapsigargin at t = 0 min, t = 7.5 min, and t = 32.5 min, respectively. (b) Sheet 2, Figure 4b. Time course for Venus-cp172Venus FLARE ICUE and mCer3-mCer3 FLARE Cameleon in Min6 cells, treated with TEA at t = 0 min. (c) Sheet 3, Figure 4c. Time course for Venus-cp172Venus FLARE Cameleon co-expressed with mCherry tagged hChR2-ER or mCherry alone. (d) Sheet 4, Figure 4e. Summary data of 2-photon in vivo imaging of Venus-cp172Venus FLARE Cameleon and mCherry-mCherry FLARE AKAR, in the muscle cells in the feet of live mice. [file elife-35458-fig4-data1.xlsx]

## Sheet: Figure 4a Multiplexed Imaging
	mCh-mCh AKAR	Ven-cpVen EKAR	mCer3-mCer3 cameleon
Time (min)	negative Δanisotropy
-4.5	0.00238639	0.00139215	0.00171804
-4	0.00172617	0.000818402	0.00104559
-3.5	0.00205887	0.00156054	0.00104514
-3	0.00152212	0.0013306	0.000672259
-2.5	0.00114928	0.00217988	-0.000240018
-2	0.000887737	0.000679104	0.000432197
-1.5	0.00117442	0.000803963	0.000166595
-1	0.0005159	-0.000819685	5.72935e-05
-0.5	0.00142685	0.000242264	-0.000326035
0	0	0	0
0.5	0.000134577	0.000724667	-0.000405908
1	0.0018844	0.00145038	-0.000492757
1.5	0.00568634	0.000222074	-0.000330465
2	0.00802795	0.00140523	-0.00117904
2.5	0.00911312	0.00130007	-0.000367831
3	0.00942211	0.00243139	-0.00115321
3.5	0.0104815	0.00102203	-0.000878205
4	0.00974706	0.00335009	-0.00134512
4.5	0.010353	0.00256704	-0.00176114
5	0.0113393	0.00177384	-0.00127322
5.5	0.0104789	0.00194355	-0.00149388
6	0.0109097	0.00193551	-0.000779132
6.5	0.0108642	0.00232819	-0.0012175
7	0.0110101	0.00115902	-0.00134447
7.5	0.0110991	0.00153568	-0.000987929
8	0.0107256	0.00148898	-0.00147167
8.5	0.011328	0.0014166	-0.00140558
9	0.0102096	0.000144244	-0.0022565
9.5	0.0108149	3.58539e-05	-0.00279896
10	0.0102223	0.000950573	-0.00297202
10.5	0.0105064	0.000364648	-0.0023375
11	0.0107797	0.00165967	-0.00288519
11.5	0.00974462	0.00423851	-0.00266931
12	0.00991383	0.00544417	-0.00289766
12.5	0.0108726	0.00751301	-0.0033825
13	0.00981644	0.00776436	-0.00278668
13.5	0.00978066	0.0100438	-0.00329041
14	0.0101605	0.0109557	-0.00300339
14.5	0.0101655	0.0101381	-0.00278258
15	0.00941711	0.0114144	-0.0036426
15.5	0.0102533	0.011222	-0.00264651
16	0.00963733	0.0106092	-0.00303627
16.5	0.00994745	0.0108805	-0.00329904
17	0.0109255	0.0118801	-0.00271975
17.5	0.00986707	0.0115554	-0.00267937
18	0.0100123	0.0116373	-0.00274262
18.5	0.0104281	0.0116559	-0.00252397
19	0.009892	0.0110548	-0.00231359
19.5	0.0108802	0.0116082	-0.00261146
20	0.0106027	0.0129056	-0.00204532
20.5	0.0101755	0.0131382	-0.00210005
21	0.0108558	0.0118227	-0.00180045
21.5	0.0104694	0.0112955	-0.00264868
22	0.00978677	0.0108119	-0.00317222
22.5	0.0106296	0.0114868	-0.00247141
23	0.0104043	0.0117456	-0.00229308
23.5	0.010487	0.0126023	-0.00259122
24	0.0103366	0.0123466	-0.0021443
24.5	0.011626	0.0129906	-0.00237188
25	0.0110425	0.0120896	-0.0024752
25.5	0.00986714	0.0114087	-0.00240639
26	0.0100814	0.0125177	-0.00205631
26.5	0.0111668	0.0121431	-0.002615
27	0.0105918	0.012916	-0.00225065
27.5	0.0108148	0.0126786	-0.00169159
28	0.0110674	0.0120261	-0.00166063
28.5	0.0109552	0.0121645	-0.00192172
29	0.0104365	0.0127669	-0.00203813
29.5	0.0118624	0.0130766	-0.00241778
30	0.0115915	0.0136458	-0.00228867
30.5	0.011106	0.0119725	-0.0020863
31	0.0111628	0.0121852	-0.000685357
31.5	0.0107138	0.0121743	-0.00150271
32	0.0102127	0.0118482	-0.000483726
32.5	0.00904639	0.011769	-0.00168244
33	0.0108819	0.012268	-0.0010883
33.5	0.00978112	0.0129793	-0.000800189
34	0.0106889	0.0127349	0.000659674
34.5	0.0111259	0.0128461	0.000641775
35	0.0110367	0.0126741	0.001635
35.5	0.0111339	0.0126908	0.00287387
36	0.0102339	0.0135946	0.0041755
36.5	0.0110162	0.0129194	0.00483049
37	0.0103263	0.0127936	0.00537719
37.5	0.0103886	0.012331	0.00534442
38	0.0106012	0.0129203	0.00543864
38.5	0.0105322	0.0116466	0.00479222
39	0.0104054	0.0121502	0.00472566
39.5	0.0107886	0.0118368	0.00508669
40	0.0109474	0.0119296	0.00467839
40.5	0.0105281	0.0121564	0.00445693
41	0.01036	0.0121934	0.00532653
41.5	0.0101561	0.0112557	0.0048887
42	0.00996692	0.0118222	0.00511893
42.5	0.0100477	0.0109045	0.00520652
43	0.0116081	0.0111928	0.00479892
43.5	0.0104151	0.0121075	0.00509814
44	0.010831	0.011562	0.00540083
44.5	0.0113264	0.0119656	0.00560802
45	0.0113075	0.011978	0.00601137
45.5	0.0108448	0.0118119	0.00595291
46	0.0103477	0.0124486	0.0055109
46.5	0.0107128	0.0117279	0.0055872
47	0.0108171	0.0120636	0.00550156

## Sheet: Figure 4b Min6 oscillations
	VcpV ICUE	Cer3 Cer3 cameleon		Min6 cells
Time (min)	Δanisotropy	negative Δanisotropy
-1.66667	0.00207374	0.00119534
-1.33333	0.00118375	0.00134797
-1	0.00125636	0.000460902
-0.666667	0.00117701	-9.12262e-05
-0.333333	2.03605e-05	0.000195035
0	0	0
0.333333	-0.000337558	-0.00170983
0.666667	0.00336732	0.00121388
1	0.000393241	-0.000108161
1.33333	-0.00188267	-0.000745296
1.66667	-0.00156925	0.00195704
2	-0.000652688	0.00375587
2.33333	0.000609165	0.00520762
2.66667	0.00529057	-0.0025817
3	0.00174275	-0.00238952
3.33333	-0.00226241	6.4838e-05
3.66667	-0.000673191	0.00247387
4	0.000260586	0.00348809
4.33333	0.0049984	-0.00194578
4.66667	0.00336972	-0.000963176
5	-0.000824167	0.000598398
5.33333	-0.00115451	0.00178926
5.66667	-0.00048013	0.00382394
6	0.00451334	-0.00171955
6.33333	0.00384094	-0.000661849
6.66667	-0.00161454	0.000742594
7	-0.000939197	0.000799263
7.33333	0.000712039	0.00468263
7.66667	0.00312914	0.00176049
8	0.00336767	-0.00164835
8.33333	0.00272347	-0.000363165
8.66667	-0.00107511	0.00195776
9	-0.00136961	0.00173827
9.33333	0.00076594	0.00285482
9.66667	0.00360398	-0.0015863
10	0.00326941	-0.000234147

## Sheet: Figure 4c optogenetics
Time (min)	mCherry-ER_hChR2	mCherry
0.68	0.00280405	-0.00150518
1.36	-0.00198246	0.00124324
2.04	-0.00108295	0.0052032
2.72	-0.00120096	0.00346622
3.4	0.000589353	-0.00361564
4.08	0.00118038	-0.000236446
4.76	-0.00156302	-0.0001476
5.44	0.00108742	5.33442e-05
6.12	-0.000772169	-0.00180871
6.8	0.00094035	-0.00265243
7.48	0.0173425	-0.00355424
8.16	0.0200685	-0.000781215
8.84	0.0212502	-0.00133317
9.52	0.0208939	-0.00165004
10.2	0.0211625	-0.00543072
10.88	0.0265835	-0.00184375
11.56	0.0168032	-0.00231919
12.24	0.0253364	-0.00101268
12.92	0.0233783	-0.0036394
13.6	0.0237252	-0.00139772
14.28	0.00561526	-0.00370496
14.96	-0.00231282	-0.00206565
15.64	-0.000274843	4.17485e-05
16.32	0.000248767	-0.00241168
17	0.00108384	-0.00738263
17.68	-0.00307133	-0.000321743
18.36	-0.00279624	0.000566321
19.04	-0.00380182	0.000153992
19.72	0.000617895	-0.00326803
20.4	-0.00062818	0.0061493
21.08	0.0213682	-0.00683095
21.76	0.0228052	-0.00208063
22.44	0.0264491	-0.002698
23.12	0.0256286	-0.00295264
23.8	0.0265959	-0.00589001
24.48	0.0273185	-0.00127318
25.16	0.0238205	-0.00277817
25.84	0.0239551	-0.00130207
26.52	0.0224114	-0.00428685
27.2	0.0231011	0.000660628
27.88	-0.00063372	-0.00299716
28.56	0.00100007	-0.00254291
29.24	0.00267868	-0.00208413
29.92	0.00135807	-0.00280117
30.6	0.000297268	-0.00184924
31.28	-0.00482044	-0.000369358
31.96	0.000358609	-0.00240847
32.64	-0.000202633	-0.00120477
33.32	-0.00219006	-0.00305147
34	-0.00129826	-0.000591013
34.68	0.021021	-0.00371243
35.36	0.0180228	-0.00246515
36.04	0.0221468	-0.00315781
36.72	0.0207326	-0.00382248
37.4	0.0206678	-0.000510372
38.08	0.022882	-0.000545446
38.76	0.0239897	-0.00533204
39.44	0.025089	-0.00201602
40.12	0.020193	-0.00356949
40.8	0.0204412	-0.00484951
41.48	-0.000456284	0.00444037
42.16	-0.00137451	-0.000852586
42.84	0.00106207	0.00291245
43.52	0.000279218	-0.00282018
44.2	-0.00208565	0.00288763
44.88	0.00176116	0.00195268
45.56	7.04007e-05	0.000370376
46.24	0.00163327	-0.00861338
46.92	0.000809633	-0.00134985
47.6	-0.00257664	-0.0041191
48.28	0.0250579	-0.000742757
48.96	0.0227974	-0.00407638
49.64	0.0190159	-0.000206052
50.32	0.0210246	-0.00109622
51	0.022882	0.000131245
51.68	0.0259095	-0.00154222
52.36	0.0203557	-0.00178037
53.04	0.0221895	-0.00747816
53.72	0.0232295	-0.00171356
54.4	0.0244823	-0.00310117
55.08	-0.000982396	0.00289777
55.76	-0.00169101	-0.00110754
56.44	0.00257756	-0.000933325
57.12	-0.00337131	-0.00274862
57.8	-0.00258948	-0.00032537
58.48	-0.00550509	0.00230422
59.16	-0.000120456	-0.00246575
59.84	0.000513138	0.00168445
60.52	-0.000100236	-0.00254032
61.2	0.00127056	0.000127101
61.88	0.0214952	-0.00206462
62.56	0.0197174	-0.00299494
63.24	0.0257616	-0.00533298
63.92	0.0198997	-0.00396584
64.6	0.0234913	-0.00277941
65.28	0.0187338	-0.000918829
65.96	0.0221106	-0.00685228
66.64	0.0261009	-0.00312524
67.32	0.0194784	0.000598584
68	0.0228055	-0.00145327
68.68	-0.00320411	0.000460385
69.36	-0.00210342	-0.00415543
70.04	-0.00252866	-0.00523361
70.72	-0.00516991	-0.00189904
71.4	-0.00135556	-0.00138999
72.08	0.00134004	-0.00204352
72.76	6.2521e-05	-0.00124608
73.44	0.00159362	0.000313917
74.12	0.0010748	-0.00574291
74.8	0.00034734	0.000908465

## Sheet: Figure 4e in vivo 2p imaging
negative Δanisotropy
Basal Ven-cpVen FLARE cameleon	FLARE cameleon	Basal mCh-mCh FLARE AKAR	isopreteronal mCh-mCh FLARE AKAR
0.0159632		-0.0090945	0.0206717
-0.0071457	0.0640317	0.0156687	0.0243884
0.0143829	0.0347376	0.0092169	0.0392951
0.0123112	0.0588696	0.0121352	0.0299267
-0.0355715	0.0823242	-0.0279344
